# Supplementary material
Source: PubMed Central journal article supplement (PMC5815001)

## Supplementary Online Content

Khera R, Pandey AP, Koshy T, et al. Role of hospital volumes in identifying low-performing and high-performing surgical valve centers in the United States. *JAMA Cardiol*. Published online November 8, 2017. doi:10.1001/jamacardio.2017.4003

**eTable 1.** National Inpatient Sample (NIS) Study Checklist

**eTable 2.** Elixhauser Comorbidities Used in the Risk-Adjustment Model in This Study

**eTable 3.** Correlation Between Procedure and Unadjusted In-Hospital Mortality

**eTable 4.** Trends in Unadjusted Median In-Hospital Mortality (and Interquartile Range) Across Deciles of Procedure Volume for Isolated Surgical Aortic Valve Replacement (SAVR)

**eTable 5.** Trends in Unadjusted Median In-Hospital Mortality (and Interquartile Range) Across Deciles of Procedure Volume for Surgical Aortic Valve Replacement (SAVR) + Coronary Artery Bypass Grafting (CABG)

**eTable 6.** Trends in Unadjusted Median In-Hospital Mortality (and Interquartile Range) Across Deciles of Procedure Volume for Mitral Valve (MV) Repair

**eTable 7.** Trends in Unadjusted Median In-Hospital Mortality (and Interquartile Range) Across Deciles of Procedure Volume for Mitral Valve (MV) Replacement

**eTable 8.** Risk-Standardized Mortality Rates (Median and Interquartile Range) for Operative Procedures in This Study

**eTable 9.** Association Between Volume and In-Hospital Mortality in the Hierarchical Risk-Adjustment Models for Valve Procedures, Reported for a 10-Unit Increase in Procedure Volumes

**eTable 10.** SAVR Patient Characteristics, 2011 to 2014

**eTable 11.** MV Repair and Replacement Patient Characteristics, 2011 to 2014

**eFigure 1.** Patient Selection Flowsheet

**eFigure 2.** Unadjusted In-Hospital Mortality by Hospital Volume

**eFigure 3.** Estimated National Procedural Volumes for (A) SAVR and (B) MVR Replacement and Repair

**eFigure 4.** Estimated In-Hospital Mortality Rates for (A) SAVR + CABG and Isolated CABG and (B) MV Replacement and Repair

This supplementary material has been provided by the authors to give readers additional information about their work.

### **Section A: Research Design**

- Does the study limit its scope to the assessment of disease conditions and/or procedures in an inpatient setting?
- Does the study infer that captured encounters do not represent distinct patients, but rather hospitalization records?
- Does the study avoid diagnosis/procedure-specific volume assessments for units that are not a part of the sampling frame of the NIS, and are therefore not representatively sampled, including
  - a) geographic units, like U.S. states
  - b) healthcare facilities (after 2011)
  - c) individual healthcare providers?

### **Section B: Data interpretation**

- Does the study attempt to identify disease conditions or procedures of interest using administrative codes or their combinations that have been previously validated?
- Does the study limit its assessment to only in-hospital outcomes, rather than those occurring after discharge?
- Does the study limit assessment of outcomes to those accurately captured in the NIS, and avoid extrapolating non-specific secondary diagnoses to infer in-hospital events?

### **Section C: Data Analysis**

- Does the study clearly account for the survey design of the NIS and its components - clustering, stratification, and weighting?
- Does the study adequately address changes in data structure over time (for trend analyses)?

**eTable 1:** National Inpatient Sample (NIS) study checklist.

**eTable 2:** Elixhauser comorbidities used in the risk-adjustment model in this study.

|                                     |                                                |
|-------------------------------------|------------------------------------------------|
| Heart failure                       | Peripheral vascular disease                    |
| Hypertension                        | Uncomplicated diabetes                         |
| Diabetes with chronic complications | Chronic pulmonary disease                      |
| Pulmonary circulation disease       | Obesity                                        |
| Weight loss                         | Paralysis                                      |
| Other neurological disorders        | Hypothyroidism                                 |
| Renal failure                       | Fluid and electrolyte disorders                |
| Liver disease                       | Alcohol abuse                                  |
| Drug abuse                          | Psychoses                                      |
| Depression                          | Peptic ulcer disease with bleeding             |
| Chronic blood loss anemia           | Iron deficiency anemia                         |
| Acquired immunodeficiency syndrome  | Lymphoma                                       |
| Metastatic cancer                   | Solid tumor without metastasis                 |
| Coagulopathy                        | Rheumatoid arthritis/collagen vascular disease |

**eTable 3:** Correlation between procedure and unadjusted in-hospital mortality

| <b>Procedure</b>      | <b>Spearman's rho</b> | <b>P-value</b> |
|-----------------------|-----------------------|----------------|
| <b>SAVR</b>           | -0.05                 | 0.16           |
| <b>SAVR + CABG</b>    | 0.09                  | 0.01           |
| <b>MV repair</b>      | 0.33                  | <.0001         |
| <b>MV replacement</b> | 0.13                  | 0.0007         |

**eTable 4:** Trends in unadjusted median in-hospital mortality (and interquartile range) across deciles of procedure volume for isolated surgical aortic valve replacement (SAVR).

| SAVR Volume Decile | SAVR volume | Mortality for isolated SAVR, % (unadjusted) |                |                |         |         |
|--------------------|-------------|---------------------------------------------|----------------|----------------|---------|---------|
|                    |             | Median                                      | Lower Quartile | Upper Quartile | Minimum | Maximum |
| 1                  | 2-13        | 6.2                                         | 0.0            | 11.4           | 0.0     | 50.0    |
| 2                  | 13-20       | 4.2                                         | 0.0            | 7.7            | 0.0     | 16.7    |
| 3                  | 20-27       | 3.2                                         | 0.0            | 6.3            | 0.0     | 29.4    |
| 4                  | 27-33       | 3.8                                         | 1.9            | 7.1            | 0.0     | 15.7    |
| 5                  | 33-43       | 3.2                                         | 1.5            | 6.3            | 0.0     | 14.8    |
| 6                  | 43-53       | 2.9                                         | 2.2            | 5.3            | 0.0     | 17.1    |
| 7                  | 53-68       | 3.7                                         | 1.0            | 5.3            | 0.0     | 15.7    |
| 8                  | 68-87       | 3.8                                         | 1.7            | 5.6            | 0.0     | 11.4    |
| 9                  | 57-136      | 3.7                                         | 2.3            | 5.2            | 0.0     | 12.5    |
| 10                 | 136-1448    | 3.0                                         | 2.0            | 4.3            | 0.0     | 6.8     |

**eTable 5:** Trends in unadjusted median in-hospital mortality (and interquartile range) across deciles of procedure volume for surgical aortic valve replacement (SAVR) + coronary artery bypass grafting (CABG).

| SAVR Volume Decile | SAVR volume | Mortality for SAVR + CABG, % (unadjusted) |                |                |         |         |
|--------------------|-------------|-------------------------------------------|----------------|----------------|---------|---------|
|                    |             | Median                                    | Lower Quartile | Upper Quartile | Minimum | Maximum |
| 1                  | 2-13        | 0.0                                       | 0.0            | 11.8           | 0.0     | 100.0   |
| 2                  | 13-20       | 0.0                                       | 0.0            | 10.0           | 0.0     | 50.0    |
| 3                  | 20-27       | 0.0                                       | 0.0            | 9.1            | 0.0     | 66.7    |
| 4                  | 27-33       | 4.0                                       | 0.0            | 9.1            | 0.0     | 26.1    |
| 5                  | 33-43       | 4.8                                       | 0.0            | 11.1           | 0.0     | 23.1    |
| 6                  | 43-53       | 4.5                                       | 0.0            | 8.3            | 0.0     | 25.0    |
| 7                  | 53-68       | 4.5                                       | 0.0            | 8.6            | 0.0     | 31.3    |
| 8                  | 68-87       | 3.6                                       | 0.0            | 7.7            | 0.0     | 16.7    |
| 9                  | 57-136      | 4.4                                       | 2.6            | 7.1            | 0.0     | 25.0    |
| 10                 | 136-1448    | 4.1                                       | 2.5            | 5.9            | 0.0     | 10.7    |

**eTable 6:** Trends in unadjusted median in-hospital mortality (and interquartile range) across deciles of procedure volume for mitral valve (MV) repair.

| MV Repair Volume Decile | MV Repair volume | Mortality for MV repair, % (unadjusted) |                |                |         |         |
|-------------------------|------------------|-----------------------------------------|----------------|----------------|---------|---------|
|                         |                  | Median                                  | Lower Quartile | Upper Quartile | Minimum | Maximum |
| 1                       | 1-2              | 0.0                                     | 0.0            | 0.0            | 0.0     | 50.0    |
| 2                       | 2-3              | 0.0                                     | 0.0            | 0.0            | 0.0     | 100.0   |
| 3                       | 3-5              | 0.0                                     | 0.0            | 0.0            | 0.0     | 66.7    |
| 4                       | 5-7              | 0.0                                     | 0.0            | 6.3            | 0.0     | 100.0   |
| 5                       | 7-9              | 0.0                                     | 0.0            | 7.1            | 0.0     | 33.3    |
| 6                       | 9-12             | 0.0                                     | 0.0            | 5.1            | 0.0     | 16.7    |
| 7                       | 12-16            | 0.0                                     | 0.0            | 8.3            | 0.0     | 28.6    |
| 8                       | 16-23            | 0.0                                     | 0.0            | 4.3            | 0.0     | 11.8    |
| 9                       | 24-39            | 2.3                                     | 0.0            | 4.8            | 0.0     | 16.0    |
| 10                      | 40-657           | 1.9                                     | 0.0            | 3.3            | 0.0     | 10.5    |

**eTable 7:** Trends in unadjusted median in-hospital mortality (and interquartile range) across deciles of procedure volume for mitral valve (MV) replacement.

| MV Replacement Volume Decile | MV Replacement volume | Mortality for MV replacement, % (unadjusted) |                |                |         |         |
|------------------------------|-----------------------|----------------------------------------------|----------------|----------------|---------|---------|
|                              |                       | Median                                       | Lower Quartile | Upper Quartile | Minimum | Maximum |
| 1                            | 1-3                   | 0.0                                          | 0.0            | 20.0           | 0.0     | 100.0   |
| 2                            | 3-5                   | 0.0                                          | 0.0            | 20.0           | 0.0     | 50.0    |
| 3                            | 5-7                   | 0.0                                          | 0.0            | 16.7           | 0.0     | 40.0    |
| 4                            | 7-9                   | 5.2                                          | 0.0            | 14.3           | 0.0     | 40.0    |
| 5                            | 9-13                  | 3.8                                          | 0.0            | 11.1           | 0.0     | 28.6    |
| 6                            | 13-16                 | 6.3                                          | 0.0            | 10.0           | 0.0     | 27.3    |
| 7                            | 16-19                 | 6.3                                          | 0.0            | 8.3            | 0.0     | 21.4    |
| 8                            | 19-25                 | 6.6                                          | 3.4            | 10.3           | 0.0     | 23.1    |
| 9                            | 25-40                 | 5.6                                          | 2.5            | 9.5            | 0.0     | 33.3    |
| 10                           | 40-398                | 5.5                                          | 2.9            | 8.0            | 0.0     | 25.8    |



**eTable 8:** Risk-standardized mortality rates (median and interquartile range) for operative procedures in this study

| <b>Procedures</b> | <b>Median RSMR</b> | <b>Interquartile range</b> |
|-------------------|--------------------|----------------------------|
| Isolated SAVR     | 2.9                | 2.8 to 3.2                 |
| SAVR + CABG       | 4.8                | 4.5 to 5.6                 |
| MV repair*        | 2.7                | 2.6 to 3.0                 |
| MV replacement*   | 6.4                | 6.1 to 7.2                 |

\* with and without CABG

**eTable 9:** Association between volume and in-hospital mortality in the hierarchical risk-adjustment models for valve procedures, reported for a 10-unit increase in procedure volumes.

|                 | Beta-coefficient for 10-unit increase in hospital procedure volume | Odds ratio for 10-unit increase in hospital procedure volume | P-value |
|-----------------|--------------------------------------------------------------------|--------------------------------------------------------------|---------|
| SAVR, isolated  | -0.00080                                                           | 0.992                                                        | <.001   |
| SAVR + CABG     | -0.00078                                                           | 0.992                                                        | <.001   |
| MV repair*      | -0.00531                                                           | 0.948                                                        | <.001   |
| MV replacement* | -0.00763                                                           | 0.927                                                        | <.001   |

\* with and without CABG

**eTable 10:** SAVR patient characteristics, 2011 to 2014

| Characteristics                      | Calendar-years  |                 |                 |                 |
|--------------------------------------|-----------------|-----------------|-----------------|-----------------|
|                                      | 2011            | 2012            | 2013            | 2014            |
| Unweighted number                    | 12476           | 11309           | 11694           | 11619           |
| Weighted number (standard deviation) | 57950<br>(5107) | 56545<br>(2031) | 58470<br>(2078) | 58095<br>(2044) |
| <b>Patient characteristics</b>       |                 |                 |                 |                 |
| Female                               | 38.1 (0.6)      | 36.4 (0.5)      | 35.4 (0.4)      | 34.4 (0.5)      |
| Race                                 |                 |                 |                 |                 |
| White                                | 75.8 (2.3)      | 77.9 (1.3)      | 78.9 (1.3)      | 78.8 (1.2)      |
| Black                                | 4.4 (0.5)       | 4.7 (0.3)       | 4.5 (0.3)       | 4.7 (0.3)       |
| Other                                | 10.1 (1.1)      | 11.1 (1.0)      | 9.9 (0.7)       | 10.1 (0.7)      |
| Missing/Unknown                      | 9.7 (2.3)       | 6.3 (1.0)       | 6.8 (1.2)       | 6.4 (1.0)       |
| <b>Comorbid conditions</b>           |                 |                 |                 |                 |
| Heart failure                        | 1.6 (0.2)       | 1.4 (0.1)       | 1.3 (0.1)       | 1.4 (0.1)       |
| Valvular Heart Disease               | 0.9 (0.1)       | 0.8 (0.1)       | 1.0 (0.1)       | 0.9 (0.1)       |
| Peripheral Vascular Disease          | 13.5 (0.9)      | 13.0 (0.4)      | 13.3 (0.5)      | 12.7 (0.4)      |
| Chronic pulmonary disease            | 18.4 (0.5)      | 18.4 (0.4)      | 18.4 (0.4)      | 18.3 (0.4)      |
| Pulmonary circulation disease        | 0.3 (0.05)      | 0.5 (0.1)       | 0.3 (0.1)       | 0.3 (0.05)      |
| Hypertension                         | 67.3 (0.6)      | 69.5 (0.5)      | 68.7 (0.6)      | 67.9 (0.5)      |
| Obesity                              | 15.3 (0.8)      | 16.6 (0.5)      | 18.2 (0.5)      | 19.3 (0.5)      |
| Weight loss                          | 4.6 (0.4)       | 4.6 (0.3)       | 4.6 (0.3)       | 3.9 (0.3)       |
| Paralysis                            | 1.5 (0.1)       | 1.7 (0.1)       | 1.5 (0.1)       | 1.3 (0.1)       |
| Other neurological disorders         | 3.9 (0.2)       | 4.2 (0.2)       | 4.3 (0.2)       | 4.3 (0.2)       |
| Diabetes w/o complications           | 23.8 (0.7)      | 25.9 (0.5)      | 25.3 (0.5)      | 24.0 (0.5)      |
| Diabetes w/ chronic complications    | 4.4 (0.6)       | 4.1 (0.3)       | 4.7 (0.3)       | 5.2 (0.3)       |
| Hypothyroidism                       | 10.9 (0.3)      | 10.9 (0.3)      | 11.4 (0.3)      | 11.0 (0.3)      |
| Renal failure                        | 15.3 (0.6)      | 14.1 (0.4)      | 13.2 (0.4)      | 14.9 (0.3)      |
| Fluid and electrolyte disorders      | 30.6 (1.7)      | 31.8 (1.1)      | 32.6 (1.0)      | 34.1 (0.9)      |
| Liver disease                        | 1.4 (0.1)       | 1.4 (0.1)       | 1.4 (0.1)       | 1.9 (0.1)       |
| Alcohol abuse                        | 1.8 (0.1)       | 2.0 (0.1)       | 2.4 (0.1)       | 2.4 (0.1)       |
| Drug abuse                           | 0.9 (0.1)       | 1.0 (0.1)       | 1.2 (0.1)       | 1.2 (0.1)       |
| Psychoses                            | 1.6 (0.2)       | 1.8 (0.1)       | 1.9 (0.1)       | 1.9 (0.1)       |
| Depression                           | 4.9 (0.3)       | 5.6 (0.2)       | 5.2 (0.2)       | 6.1 (0.2)       |
| Chronic blood loss anemia            | 1.5 (0.3)       | 1.0 (0.1)       | 1.0 (0.1)       | 0.9 (0.1)       |
| Peptic ulcer disease                 | 0.0 (0.01)      | 0.0 (0.01)      | 0.0 (0.01)      | 0.0 (0.02)      |
| Iron deficiency anemia (ANEMDEF)     | 16.9 (1.5)      | 15.2 (0.6)      | 14.6 (0.6)      | 13.2 (0.5)      |
| AIDS                                 | 0.1 (0.02)      | 0.1 (0.03)      | 0.1 (0.02)      | 0.1 (0.02)      |
| Lymphoma                             | 0.7 (0.1)       | 0.7 (0.1)       | 0.7 (0.1)       | 0.7 (0.1)       |
| Metastatic cancer                    | 0.2 (0.05)      | 0.2 (0.04)      | 0.1 (0.03)      | 0.2 (0.04)      |
| Solid tumor without metastasis       | 1.2 (0.1)       | 1.2 (0.1)       | 1.1 (0.1)       | 1.0 (0.1)       |
| Coagulopathy                         | 27.5 (1.4)      | 28.6 (0.9)      | 30.3 (0.9)      | 30.7 (0.8)      |
| Arthritis                            | 2.5 (0.2)       | 2.7 (0.2)       | 2.6 (0.1)       | 2.5 (0.1)       |
| Death                                | 3.2 (0.2)       | 3.0 (0.2)       | 2.8 (0.2)       | 2.9 (0.2)       |

Numbers represent % and SE unless otherwise specified

Abbreviations: SD – standard deviation, SEM – standard error of mean, C.I. – confidence interval, ESRD – End-stage renal disease

**eTable 11: MV repair and replacement patient characteristics, 2011 to 2014**

| Characteristics                   | Calendar-years   |                  |                  |                  |
|-----------------------------------|------------------|------------------|------------------|------------------|
|                                   | 2011             | 2012             | 2013             | 2014             |
| Unweighted number                 | 5546             | 5060             | 5304             | 5434             |
| Weighted number                   | 25817<br>(2296)  | 25300<br>(1209)  | 26520<br>(1253)  | 27170<br>(1251)  |
| <b>Patient characteristics</b>    |                  |                  |                  |                  |
| Female                            | 47.1 (0.9)       | 45.4 (0.8)       | 46.5 (0.7)       | 46.4 (0.7)       |
| Race                              |                  |                  |                  |                  |
| White                             | 70.4 (2.4)       | 72.8 (1.7)       | 72.5 (1.5)       | 71.8 (1.4)       |
| Black                             | 8.3 (0.7)        | 8.7 (0.6)        | 8.9 (0.5)        | 9.1 (0.6)        |
| Other                             | 11.6 (1.5)       | 12.3 (1.0)       | 12.0 (0.8)       | 12.1 (0.8)       |
| Missing/Unknown                   | 9.7 (2.4)        | 6.2 (1.6)        | 6.7 (1.4)        | 7.0 (1.3)        |
| <b>Comorbid conditions</b>        |                  |                  |                  |                  |
| Heart failure                     | 2.4 (0.2)        | 2.2 (0.2)        | 2.5 (0.2)        | 2.8 (0.2)        |
| Valvular Heart Disease            | 1.6 (0.2)        | 1.7 (0.2)        | 1.3 (0.2)        | 1.7 (0.2)        |
| Peripheral Vascular Disease       | 7.3 (0.6)        | 7.0 (0.4)        | 6.5 (0.4)        | 7.4 (0.4)        |
| Chronic pulmonary disease         | 17.4 (0.8)       | 17.4 (0.6)       | 17.6 (0.6)       | 17.9 (0.6)       |
| Pulmonary circulation disease     | 0.7 (0.1)        | 0.7 (0.1)        | 0.7 (0.1)        | 0.9 (0.1)        |
| Hypertension                      | 52.8 (0.8)       | 55.1 (0.9)       | 55.9 (0.8)       | 54.9 (0.7)       |
| Obesity                           | 9.0 (0.6)        | 10.2 (0.5)       | 10.9 (0.6)       | 12.2 (0.5)       |
| Weight loss                       | 6.6 (0.7)        | 5.4 (0.4)        | 6.3 (0.5)        | 6.3 (0.5)        |
| Paralysis                         | 1.8 (0.2)        | 2.1 (0.2)        | 1.7 (0.2)        | 1.8 (0.2)        |
| Other neurological disorders      | 3.8 (0.3)        | 4.2 (0.3)        | 3.6 (0.2)        | 4.2 (0.3)        |
| Diabetes w/o complications        | 14.2 (0.8)       | 14.3 (0.6)       | 14.3 (0.6)       | 13.9 (0.6)       |
| Diabetes w/ chronic complications | 2.6 (0.4)        | 2.1 (0.2)        | 3.4 (0.3)        | 3.2 (0.3)        |
| Hypothyroidism                    | 9.6 (0.4)        | 9.7 (0.4)        | 10.4 (0.4)       | 9.2 (0.4)        |
| Renal failure                     | 13.1 (0.6)       | 12.1 (0.6)       | 11.8 (0.5)       | 13.2 (0.5)       |
| Fluid and electrolyte disorders   | 32.8 (1.8)       | 33.4 (1.5)       | 34.9 (1.2)       | 38.6 (1.3)       |
| Liver disease                     | 1.6 (0.2)        | 1.1 (0.1)        | 1.7 (0.2)        | 1.3 (0.1)        |
| Alcohol abuse                     | 2.0 (0.2)        | 2.1 (0.2)        | 2.0 (0.2)        | 2.3 (0.2)        |
| Drug abuse                        | 1.3 (0.2)        | 1.6 (0.2)        | 1.6 (0.2)        | 2.0 (0.2)        |
| Psychoses                         | 2.1 (0.3)        | 1.8 (0.2)        | 2.3 (0.2)        | 2.2 (0.2)        |
| Depression                        | 6.4 (0.4)        | 5.6 (0.3)        | 6.2 (0.3)        | 5.9 (0.3)        |
| Chronic blood loss anemia         | 1.7 (0.3)        | 0.7 (0.1)        | 0.8 (0.1)        | 0.9 (0.2)        |
| Peptic ulcer disease              | 0 (0)            | 0.0 (0.02)       | 0 (0)            | 0.0 (0.02)       |
| Iron deficiency anemia            | 17.1 (1.9)       | 14.1 (0.7)       | 13.8 (0.7)       | 12.4 (0.6)       |
| AIDS                              | 0.1 (0.04)       | 0.1 (0.06)       | 0.1 (0.05)       | 0.1 (0.05)       |
| Lymphoma                          | 0.5 (0.1)        | 0.6 (0.1)        | 0.6 (0.1)        | 0.4 (0.1)        |
| Metastatic cancer                 | 0.1 (0.04)       | 0.2 (0.06)       | 0.1 (0.05)       | 0.2 (0.1)        |
| Solid tumor without metastasis    | 0.8 (0.1)        | 0.8 (0.1)        | 0.6 (0.1)        | 0.6 (0.1)        |
| Coagulopathy                      | 25.7 (1.6)       | 25.7 (1.0)       | 25.6 (0.9)       | 26.6 (0.8)       |
| Arthritis                         | 2.2 (0.2)        | 2.5 (0.2)        | 2.6 (0.2)        | 2.6 (0.2)        |
| <b>Death</b>                      | <b>3.8 (0.3)</b> | <b>3.9 (0.3)</b> | <b>3.7 (0.3)</b> | <b>3.6 (0.3)</b> |

Numbers represent % and SE unless otherwise specified

Abbreviations: SD – standard deviation, SEM – standard error of mean, C.I. – confidence interval, ESRD – End-stage renal disease

**eFigure 1: Patient selection flowsheet**

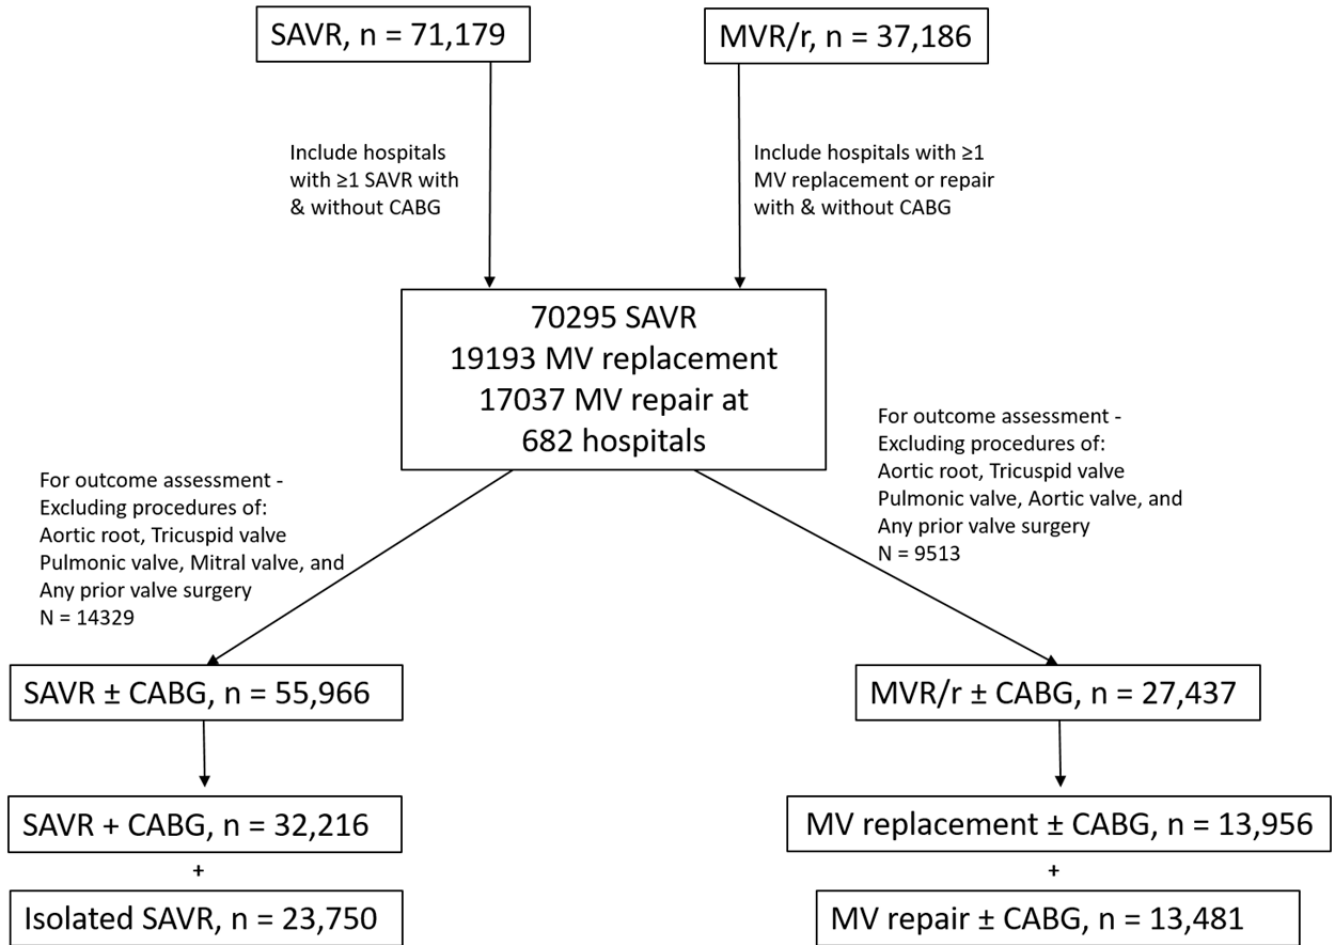

**Abbreviations:** SAVR: Surgical Aortic Valve Replacement, MV: Mitral valve, CABG: Coronary Artery Bypass

Grafting

**eFigure 2:** Unadjusted in-hospital mortality by hospital volume. Horizontal line represents the mean mortality for each condition, the dotted lines represent the 95% confidence intervals as a binominal distribution around the mean volume for the procedure. The values between the confidence intervals represent those expected by chance alone.

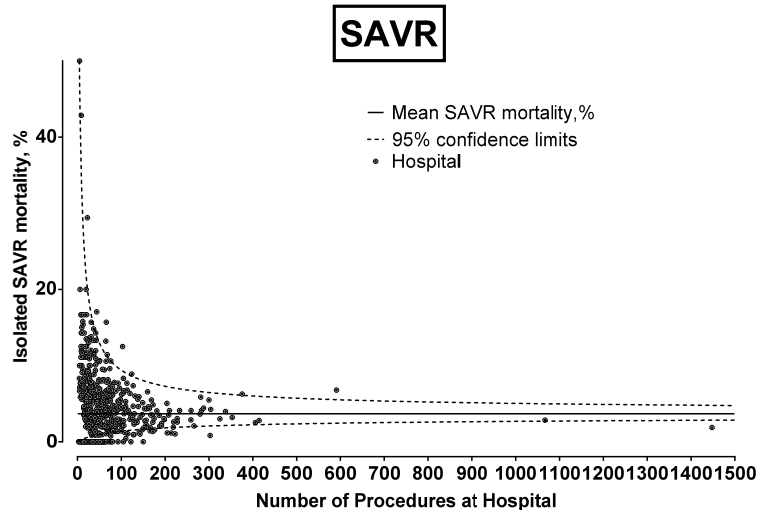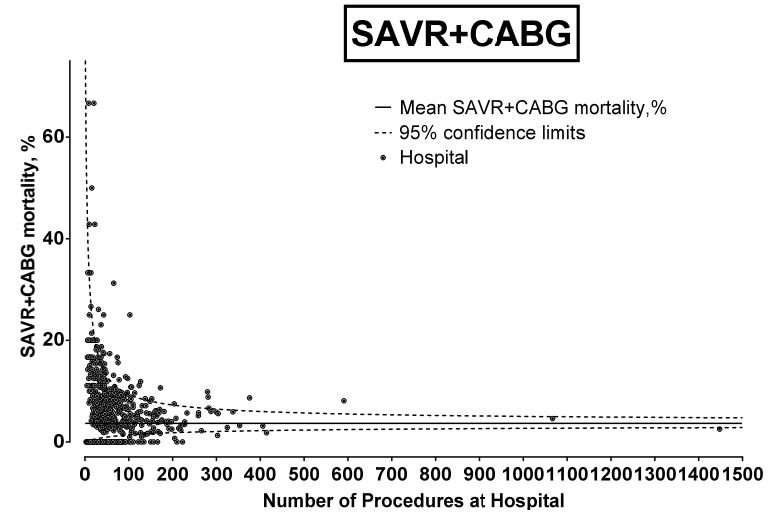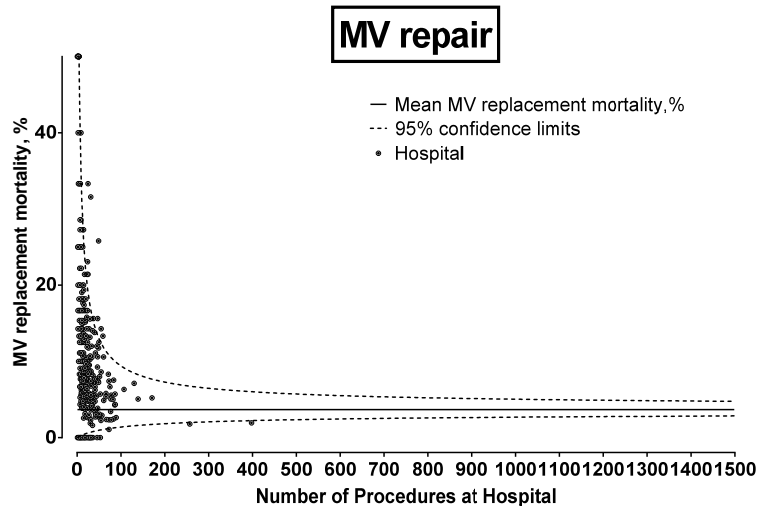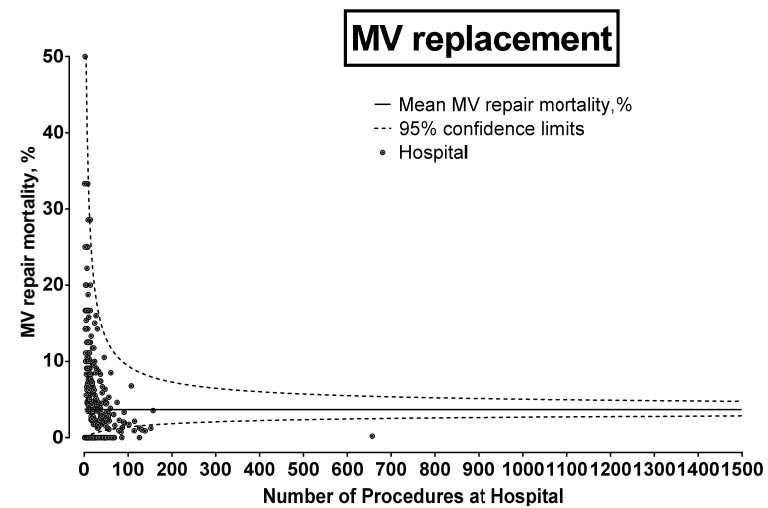

**eFigure 3:** Estimated National Procedural Volumes for (A) SAVR and (B) MVR Replacement and Repair (2005-2014).

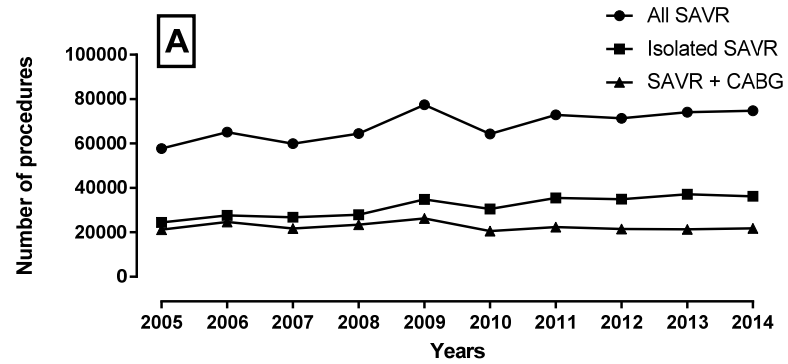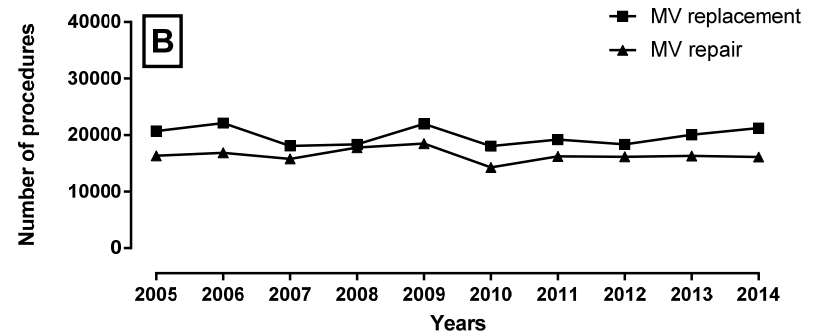

**eFigure 4:** Estimated In-Hospital Mortality Rates for (A) SAVR + CABG and Isolated CABG and (B) MV Replacement and Repair (2005-2014).

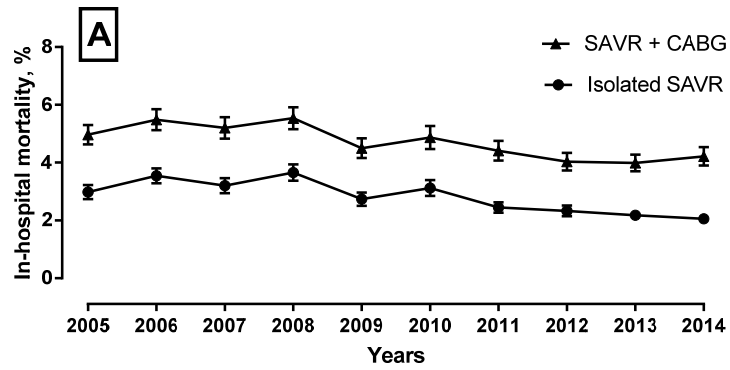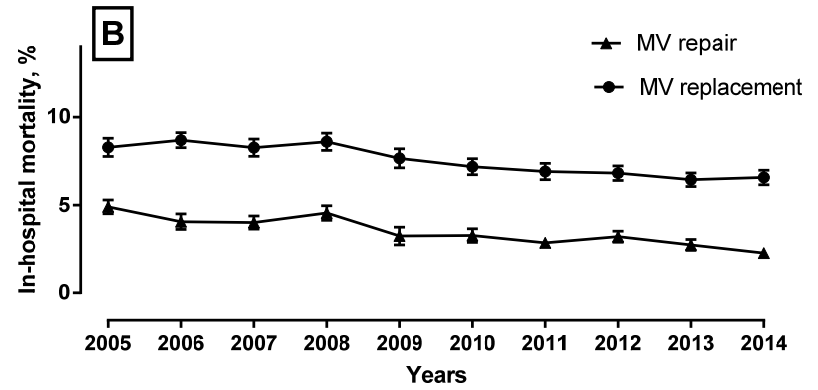

Supplement: jamacardiol-2-1322-s001.pdf [file jamacardiol-2-1322-s001.pdf]
